# Supplementary material for: Metal-organic chemical vapor deposition of aluminium oxynitride from propylamine–dimethylaluminium hydride and oxygen: growth mode dependence and performance optimization
Source: Royal Society of Chemistry journal article supplement (doi:10.1039/c2jm16747f), 2012-01-01
Supplement: c2jm16747f.pdf [file c2jm16747f.pdf]

## Electronic Supplementary Information for

Metalorganic chemical vapor deposition of aluminum oxynitride from dimethylaluminum  
hydride and oxygen: growth mode dependence and performance optimization

Gang He,<sup>a\*</sup> Zhaoqi Sun,<sup>a</sup> Shiwei Shi,<sup>a</sup> Xiaoshuang Chen,<sup>b</sup> Jianguo Lv,<sup>c</sup> and Lide Zhang<sup>d</sup>

*<sup>a</sup>School of Physics and Materials Science, Anhui University, Hefei 230039, People's  
Republic of China.*

*<sup>b</sup>National Laboratory for Infrared Physics, Chinese Academy of Sciences, Shanghai  
Institute of Technical Physics, 500 Yutian Road, Shanghai 200083, People's Republic of  
China.*

*<sup>c</sup>Department of Physics and Electronic Engineering, Hefei Normal University, Hefei  
230061, China;*

*<sup>d</sup>Key Laboratory of Materials Physics, Anhui Key Laboratory of Nanomaterials and  
Nanostructure, Institute of Solid State Physics, Chinese Academy of Sciences, Hefei  
230031, People's Republic of China.*

*Email: [hegang@ahu.edu.cn](mailto:hegang@ahu.edu.cn)*

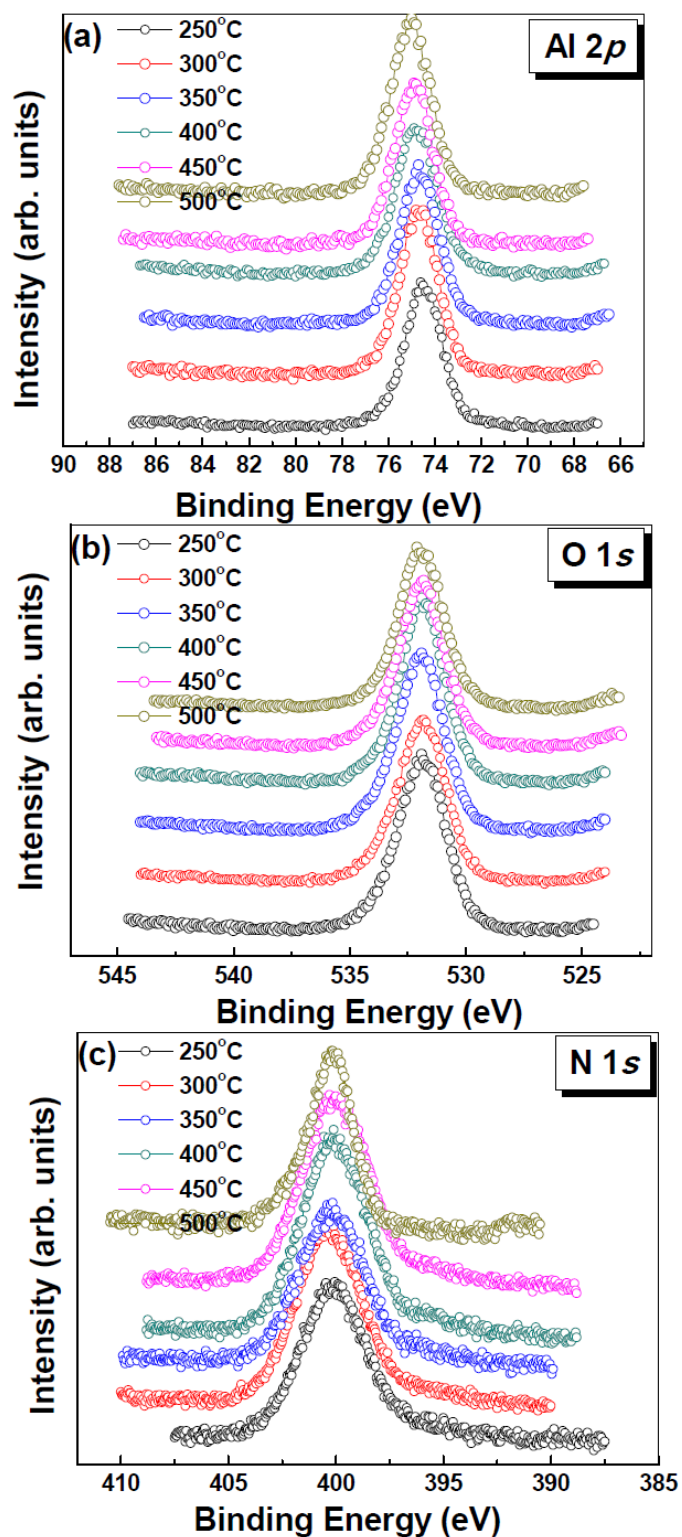

Fig. S1 Deposition temperature dependent Al 2p, O 1s, and N 1s core level

photoemission spectra of as-processed  $\text{AlO}_x\text{N}_y$  films grown on Si. All the samples were sputtered by  $\text{Ar}^+$  for 1min.

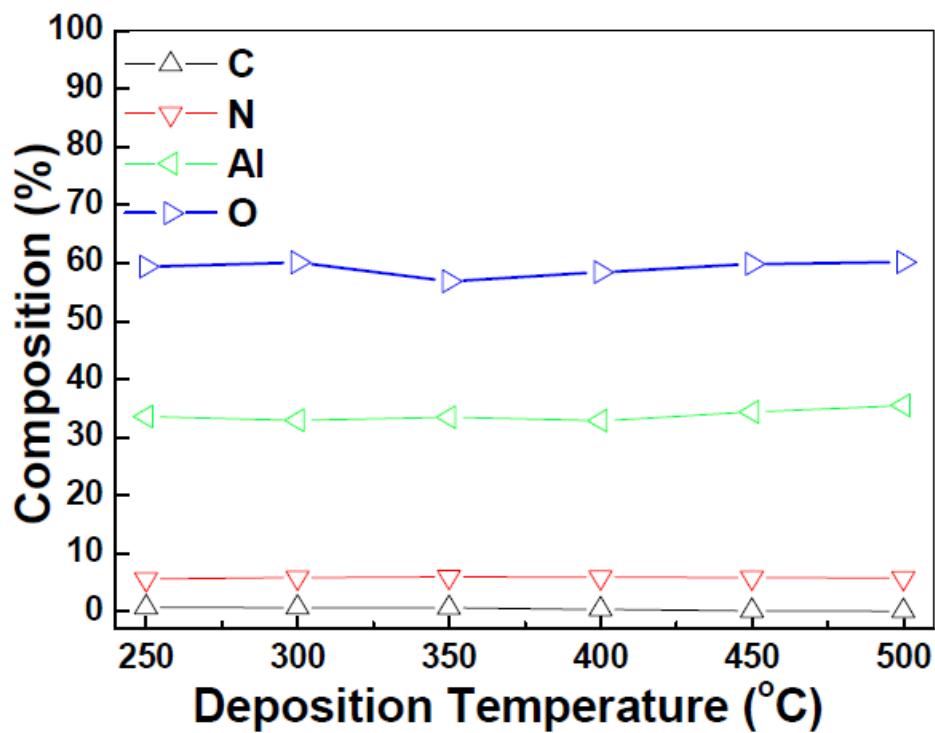

**Fig. S2** Deposition temperature dependent composition distribution in as-processed  $\text{AlO}_x\text{N}_y$  films. All the samples were sputtered by  $\text{Ar}^+$  for 1min.
